# Supplementary material for: Surface-enhanced Raman spectroscopy studies of yellow organic dyestuffs and lake pigments in oil paint
Source: Royal Society of Chemistry journal article supplement (doi:10.1039/c3an00611e), 2013-01-01
Supplement: c3an00611e.pdf [file c3an00611e.pdf]

## Electronic Supplementary Information

Manuscript Title: Surface-enhanced Raman spectroscopy studies of yellow organic dyestuffs and lake pigments in oil paint

Author(s): Mayhew, Hannah E.; Fabian, David M.; Wustholz, Kristin L.

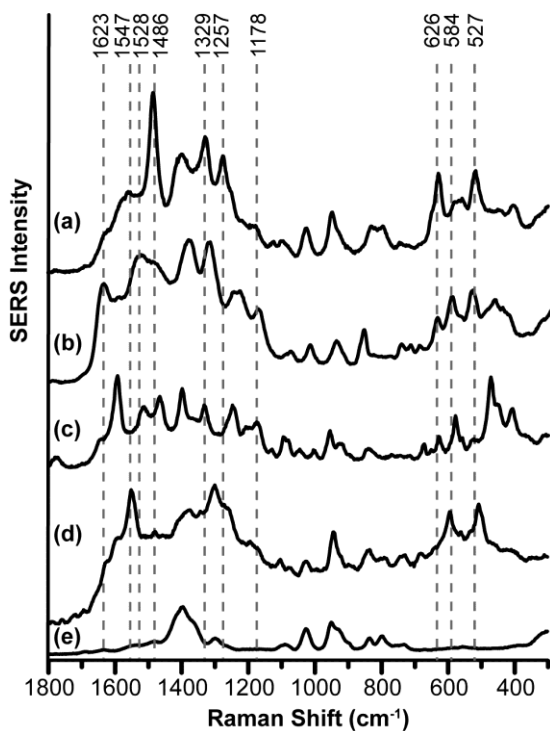

Fig. 1S

SERS spectra of untreated (a) old fustic bound in linseed oil, (b) morin, (c) kaempferol, (d) maclurin and (e) blank silver colloids, obtained at 632.8 nm with  $P_{exc} = 30 \mu\text{W}$  and  $t_{aq} = 30 \text{ s}$ . Labelled peaks are consistent with old fustic. The SERS bands for kaempferol are in close proximity to those for its structural analog, quercetin (Figure 4). Major peaks for maclurin are observed at  $1555 \text{ cm}^{-1}$ ,  $1302 \text{ cm}^{-1}$ ,  $594 \text{ cm}^{-1}$ , and  $506 \text{ cm}^{-1}$ .
